# Supplementary material for: Clinical and Pathologic Features Associated with Low Circulating Tumor DNA Fraction in Endometrial and Ovarian Cancers
Source: Preprints.org preprint supplement (doi:10.20944/preprints202409.1591.v1), 2024-09-20
Supplement: Supplementary file 1 [file supplementary]

Clinical and Pathologic Features Associated with Low Circulating Tumor DNA Fraction in Endometrial and Ovarian Cancers

Mark Vater1*, Alison Garrett2*, Katharine Collier1,3, Peter Rose4, Gabriel Tinoco1,3, Ava Strahan1, Daniel G. Stover1,3+, Haider Mahdi2,5+


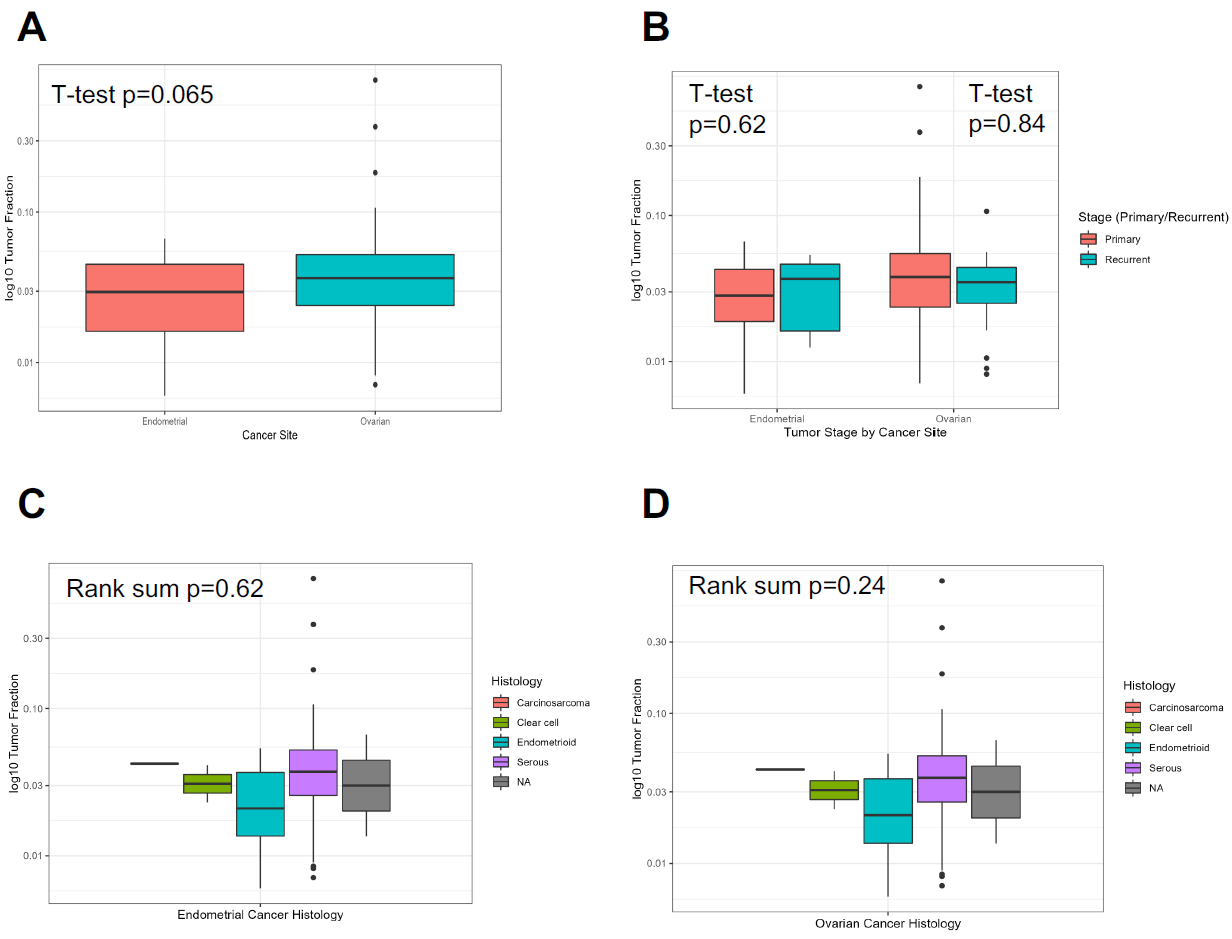


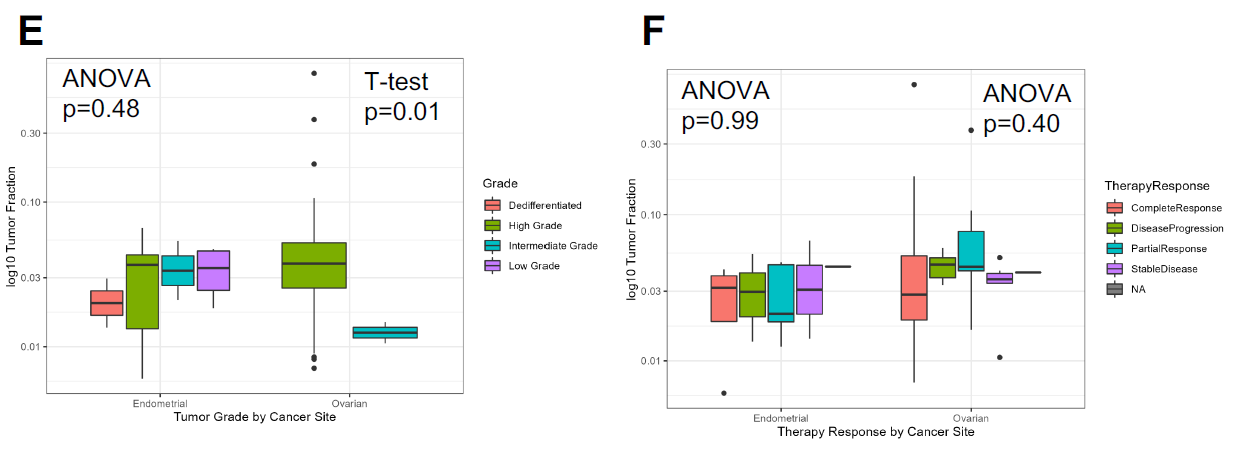


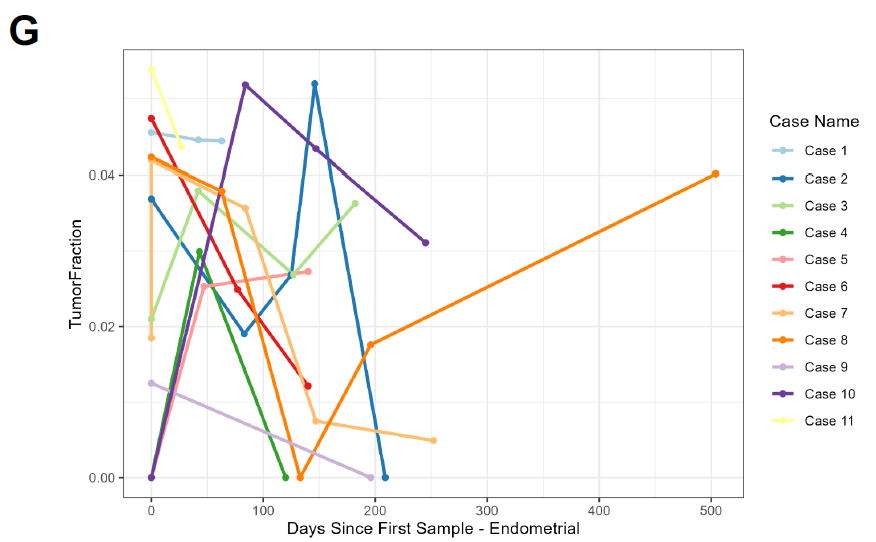


**Figure S1.** Association of Tumor Fraction with Clinicopathologic Characteristics in Patients with Ovarian and Endometrial Cancers. To avoid duplicate sample bias, the association of the tumor fraction (TFx) of the first ‘sentinel’ blood draw was evaluated relative to clinicopathologic characteristics, including: (A) ovarian versus endometrial cancer; (B) primary versus recurrent settings within each individual cancer type; (C-D) tumor histology within each cancer type; (E) tumor grade; (F) best overall therapy response. TFx is presented as log10 transformed in each y-axis.

| **Table S1. Tumor fraction association with clinical and pathologic variables in endometrial and ovarian cancer.** | | | | |
| --- | --- | --- | --- | --- |
| Cancer Site | Outcome | Raw P-Value | Adjusted P-Value | Test Type |
| Endometrial | Histology | 0.620 | 0.861 | Rank Sum |
| Endometrial | MSI | 0.242 | 0.861 | T-test |
| Endometrial | Grade | 0.481 | 0.861 | ANOVA |
| Endometrial | Stage | 0.622 | 0.861 | Rank Sum |
| Endometrial | Therapy Response | 0.990 | 0.990 | ANOVA |
| Endometrial | Vital Status | 0.527 | 0.861 | ANOVA |
| Endometrial | Metastasis - Peritoneal | 0.646 | 0.861 | T-test |
| Endometrial | Metastasis - Liver | 0.579 | 0.861 | T-test |
| Endometrial | Metastasis - Pleural | 0.705 | 0.861 | T-test |
| Endometrial | Metastasis - Nodal | 0.988 | 0.990 | T-test |
| Endometrial | Metastasis - Other | 0.061 | 0.667 | Rank Sum |
| Ovarian | Histology | 0.239 | 0.614 | Rank Sum |
| Ovarian | BRCA | 0.273 | 0.614 | T-test |
| Ovarian | Grade | 0.010 | 0.094 | T-test |
| Ovarian | Stage | 0.841 | 0.841 | Rank Sum |
| Ovarian | Therapy Response | 0.398 | 0.716 | ANOVA |
| Ovarian | Vital Status | 0.828 | 0.841 | ANOVA |
| Ovarian | Metastasis - Peritoneal | 0.623 | 0.801 | T-test |
| Ovarian | Metastasis - Liver | 0.481 | 0.722 | T-test |
| Ovarian | Metastasis - Pleural | 0.180 | 0.614 | T-test |
